# Supplementary material
Source: PubMed Central journal article supplement (PMC11178149)
Supplement: NIHMS1992421-supplement-2.pdf [file NIHMS1992421-supplement-2.pdf]

## **Appendix**

### **Table of contents**

|                                                                                                                |         |
|----------------------------------------------------------------------------------------------------------------|---------|
| Antimicrobials.....                                                                                            | Page 2  |
| Methods.....                                                                                                   | Page 3  |
| Whole genome sequencing and tecovirimat resistant results.....                                                 | Page 6  |
| References.....                                                                                                | Page 7  |
| Table 1. Allele frequencies of VP37 mutations detected in different tissue specimens.....                      | Page 8  |
| Table 2. Clinical laboratory results.....                                                                      | Page 9  |
| Table 3. Diagnostic test results.....                                                                          | Page 10 |
| Supplemental Figure 1. Major event and symptoms time-line.....                                                 | Page 13 |
| Supplemental Figures 2A-2M. Mpox lesions across the skin, gastrointestinal system, and cytopathic effects..... | Page 14 |

## **Antimicrobials**

During his hospital stay, the patient was treated with oral tecovirimat (Day of Illness 22-Day of Illness 36/Hospital Day 11 and Hospital Day 12-Hospital Day 27), bictegravir/emtricitabine/tenofovir alafenamide (Hospital Day 11-Hospital Day 24), atazanavir/ritonavir/dolutegravir/tenofovir alafenamide (Hospital Day 25-Hospital Day 27), ceftriaxone (Hospital Day 4-Hospital Day 25), metronidazole (Hospital Day 4-Hospital Day 15; Hospital Day 17-Hospital Day 19; Hospital Day 23-Hospital Day 25), meropenem (Hospital Day 25-Hospital Day 27), vancomycin (oral: Hospital Day 2-Hospital Day 4; IV: Hospital Day 4-Hospital Day 27), fluconazole (Hospital Day 1-Hospital day 18), micafungin (Hospital Day 23-Hospital Day 27), and trimethoprim/sulfamethoxazole (Hospital Day 2-Hospital Day 12; Hospital Day 24-Hospital Day 27).

## **Methods**

### **Specimen collection**

Autopsy was performed at the Los Angeles County Department of Medical Examiner-Coroner by Virchow dissection at a negative pressure room. The Medical Examiner-Coroner had received the ACAM2000 vaccine prior to autopsy. The Medical Examiner Fellow and the tech assisting with the autopsy received the JYNNEOS vaccine after the autopsy was completed.

Clinical specimens for orthopoxvirus diagnostic testing were collected per the U.S. Centers for Disease Control and Prevention (CDC) guidelines<sup>1</sup>. Lesion swabs in viral transport media and fresh, unfixed tissue from major organs were submitted for real-time Polymerase Chain Reaction (PCR) diagnostic testing. Formalin-fixed tissues from major organs were used to prepare paraffin embedded tissue blocks for histology. This activity was reviewed by CDC and was conducted consistent with applicable federal law and CDC policy (45 C.F.R. part 46.102(l)(2), 21 C.F.R. part 56; 42 U.S.C. §241(d); 5 U.S.C. §552a; 44 U.S.C. §3501 et seq.). The decedent's family consented to the autopsy and was aware of the possible publication of this manuscript.

### **Diagnostic testing**

DNA was extracted using the QIAGEN QIAamp DSP DNA Blood Mini Kit Tissue Kit (Germantown, MD) and tested using the 510(k) cleared non-variola Orthopoxvirus real-time PCR assay following CDC Laboratory Response Network (LRN) protocols<sup>2,3</sup>.

Histology slides prepared from sampled organs were stained with hematoxylin and eosin (H&E), scanned, and interpreted using a VENTANA DP 200 slide scanner (Roche Diagnostics, Rotkreuz, Switzerland). Mpox immunochemistry stain was not available, no immunochemistry was performed to identify virus in tissues.

### **Whole genome sequencing and genomic analysis of mpox virus specimens**

Libraries were generated from extracted DNA using a tiling-amplicon based approach<sup>10</sup> and prepared for sequencing with the Illumina DNA prep kit (Illumina, San Diego, California). Pooled libraries were sequenced on the Illumina MiSeq v. 2 (paired-end 150), with 0.5-1 million reads per library. Primers were trimmed and consensus genomes generated at a minimum depth of coverage of 5X via the TheiaCoV\_Illumina\_PE Workflow Series on Terra.bio<sup>11</sup>. Consensus genomes were analyzed with Nextclade<sup>12</sup> to determine clade, lineage, and mutations present relative to the lineage B.1 reference genome. Allele frequencies for tecovirimat mutations were determined using Geneious version 2022.2.2 (<https://www.geneious.com/>). Consensus genomes of sufficient quality were submitted to GISAID (Global Initiative on Sharing Avian Influenza Data); raw reads were submitted to SRA (Sequence Read Archive), both are public data repositories. Accession numbers are provided.

### **Tecovirimat resistance assay**

Tissue samples were homogenized and inoculated on confluent African Green monkey kidney BSC-40 cells. At 4+ (75%-100%) cytopathic effect, the cell monolayer and supernatant were harvested. Virus titers were determined by serial dilution plaque assay in the same cell line. For tecovirimat resistance, the drug was added to confluent Vero E-6 cells in 96-well plates in a staggered 10-fold dilution ranging from 0.0015 – 5.0  $\mu$ M drug concentration and incubated 1 hour at 37° C in 6% CO<sub>2</sub>. Plates were then infected with 0.01 – 0.02 multiplicity of infection (MOI) of virus and incubated 3 days at 35° C in 6% CO<sub>2</sub>. After incubation, cell plates were fixed with crystal violet stain containing formalin (F.C. v/v > 4%) to visualize intact cells. A PerkinElmer EnSpire multimode plate reader (PerkinElmer, Waltham, MA) was used to measure absorbance at 570 nm. GraphPad Prism (GraphPad Software, San Diego, CA) was used to

calculate the half maximal effective concentration (EC50) for tecovirimat. Extended concentration tecovirimat resistance assays up to 500  $\mu\text{M}$  drug concentration were subsequently set up to determine antiviral endpoint.

## **Whole genome sequencing and tecovirimat resistance results**

Whole genome sequencing confirmed mpox Clade IIb lineage B.1.2 (Nextclade) on fifteen post-mortem specimens. Six known mutations linked with high-level tecovirimat resistance in vaccinia virus, originally reported in laboratory cell culture, were identified in the OPG057 gene (F13L) encoding the VP37 protein<sup>4,5</sup>. At least one previously described mutation was identified in each specimen, with several specimens having multiple mutations. Mutation P243S with unknown phenotypic effect was also identified. All mutations were present as heterogeneous populations. Viable virus was successfully cultured from 12 of 15 tissue specimens received for resistance testing; liver, brain and adrenal tissue could not be cultured due to destruction of the cell monolayer one day post inoculation likely caused by contamination or due to cytotoxic effect of the tissues themselves. Tecovirimat resistance was confirmed by phenotypic testing on all twelve tissues. Resistance was observed in some tissues at a minimum  $EC_{50} \sim 0.5 \mu\text{M}$  tecovirimat and at a maximum in some tissues  $> 500 \mu\text{M}$ . Compared to a reference strain (mpox Clade IIa, 2003, US) these isolates were  $1.5 \log_{10}$  to  $> 4.5 \log_{10}$  more resistant.

## References:

1. Lab Advisory: CDC Specimen Collection Guidelines for Monkeypox. Centers for Disease Control and Prevention (CDC). [https://www.cdc.gov/locs/2022/05-16-2022-lab-advisory-cdc\\_specimen\\_collection\\_guidelines\\_monkeypox\\_virus.html](https://www.cdc.gov/locs/2022/05-16-2022-lab-advisory-cdc_specimen_collection_guidelines_monkeypox_virus.html) Accessed September 26, 2022.
2. Centers for Disease Control and Prevention – Laboratory Response Network. Extraction of Orthopoxvirus DNA using QIAGEN QIAamp DSP DNA Blood Mini Kit for Subsequent Testing by a Real-time PCR Assay. Protocol #1130-R4.
3. Centers for Disease Control and Prevention – Laboratory Response Network. Detection of Non-variola Orthopoxvirus DNA by Fluorogenic 5' Nuclease Assay using the Applied Biosystems® 7500 Fast Dx Real-time PCR Instrument. Protocol #1108-R9.
4. Duraffour S, Lorenzo MM, Zöller G, et al. ST-246 is a key antiviral to inhibit the viral F13L phospholipase, one of the essential proteins for orthopoxvirus wrapping. J Antimicrob Chemother. 2015 May;70(5):1367-80.
5. FDA Monkeypox Response. <https://www.fda.gov/emergency-preparedness-and-response/mcm-issues/fda-monkeypox-response> Accessed September 19, 2022

**Table 1.** Allele frequencies of VP37 mutations detected in different tissue specimens

| Specimen Source | Allele Frequencies (Max = 1) |        |        |        |        |        |        | Cycle Threshold Values | Accession Numbers |             |
|-----------------|------------------------------|--------|--------|--------|--------|--------|--------|------------------------|-------------------|-------------|
|                 | P243S                        | N267D* | A288P* | A290V* | D294V* | A295E* | I372N* |                        | GISAID‡           | SRA‡        |
| Skin†           | -                            | -      | 0.9    | -      | 0.4    | -      | -      | 13.98                  | EPI_ISL_15120471  | SRS15247069 |
| Skin†           | -                            | 0.14   | 0.33   | 0.18   | 0.21   | -      | -      | 13.76                  | EPI_ISL_15120472  | SRS15247070 |
| Spleen†         | -                            | -      | 0.29   | 0.14   | 0.17   | 0.13   | -      | 14.21                  | EPI_ISL_15120473  | SRS15247071 |
| Lymph†          | -                            | 0.16   | 0.45   | 0.11   | 0.15   | -      | -      | 13.52                  | EPI_ISL_15120474  | SRS15247072 |
| Liver           | -                            | 0.11   | 0.28   | 0.15   | 0.16   | -      | -      | 15.04                  | EPI_ISL_15120475  | SRS15247073 |
| Lung†           | 0.24                         | 0.11   | 0.25   | 0.14   | 0.14   | -      | -      | 17.28                  | EPI_ISL_15120476  | SRS15247074 |
| Kidney†         | 0.17                         | 0.12   | 0.21   | 0.15   | 0.2    | -      | -      | 20.87                  | EPI_ISL_15120477  | SRS15247075 |
| Heart†          | 0.32                         | -      | 0.14   | 0.15   | 0.11   | -      | -      | 22.35                  | EPI_ISL_15120478  | SRS15247086 |
| Bone Marrow†    | -                            | -      | 0.37   | 0.21   | -      | -      | -      | 17.2                   | -                 | -           |
| Adrenal         | -                            | -      | 0.33   | 0.13   | 0.24   | -      | -      | 15.73                  | EPI_ISL_15120479  | SRS15247085 |
| Brain           | -                            | -      | 0.13   | 0.24   | -      | 0.12   | -      | 21.88                  | EPI_ISL_15120480  | SRS15247087 |
| GI Tract†       | -                            | -      | 0.1    | 0.13   | 0.14   | 0.6    | -      | 13.32                  | EPI_ISL_15120481  | SRS15247088 |
| Pleural Fluid†  | -                            | -      | 0.17   | -      | -      | 0.1    | -      | 22.62                  | EPI_ISL_15120482  | SRS15247089 |
| Facial Lesion†  | -                            | -      | -      | 0.96   | -      | -      | -      | 20.09                  | EPI_ISL_15120483  | SRS15247090 |
| Testicular†     | -                            | -      | -      | 0.2    | -      | -      | 0.52   | 19.46                  | EPI_ISL_15120484  | SRS15247091 |

\* Associated with tecovirimat resistance in vaccinia virus †Confirmed phenotypic resistance ‡GAIS: Global Initiative on Sharing Avian Influenza Data; SRA:



**Table 2. Clinical Laboratory Results**

| Measure                              | Reference range | Illness Day 26,<br>Hospital Day 2 | Illness Day 32,<br>Hospital Day 8 | Illness Day 41,<br>Hospital Day 17 | Illness Day 43,<br>Hospital Day 19 | Illness Day 47,<br>Hospital Day 21 | Illness Day 48,<br>Hospital Day 24 | Illness Day 50,<br>Hospital Day 26 |
|--------------------------------------|-----------------|-----------------------------------|-----------------------------------|------------------------------------|------------------------------------|------------------------------------|------------------------------------|------------------------------------|
| White-cell count (per µl)            | 4.5 - 10.0      | 31.5*                             | 10.9*                             | 13.6*                              | 28.3*                              | 68.9*                              | 80*                                | 126*                               |
| Red-cell count (per µl)              | 4.40 - 5.60     | -                                 | -                                 | -                                  | -                                  | -                                  | -                                  | -                                  |
| Platelet count (per µl)              | 160 - 360       | 181                               | 185                               | 404*                               | 386*                               | 163                                | 114†                               | pts clumped                        |
| Hemoglobin (g/dl)                    | 13.5 - 16.5     | 15.2                              | 12.3†                             | 10.2†                              | 9.9†                               | 9.3†                               | 8.4†                               | 8†                                 |
| Hematocrit (%)                       | 40 - 49         | 46.4                              | 37.2                              | 30.7†                              | 30†                                | 27.8†                              | 26.5†                              | 25.9†                              |
| Sodium (mmol/liter)                  | 135 - 145       | 121†                              | 132†                              | 131†                               | 134†                               | 129†                               | 128†                               | 128†                               |
| Potassium (mmol/liter)               | 3.5 - 5.1       | 5.3*                              | 4.4                               | 4.1                                | 4.4                                | 6.3*                               | 4.4                                | 5.4*                               |
| Chloride (mmol/liter)                | 100 - 110       | 86†                               | 97†                               | 99†                                | 101                                | 98†                                | 97†                                | 97                                 |
| Carbon dioxide (mmol/liter)          | 20 - 30         | 22                                | 24                                | 21                                 | 17†                                | 21                                 | 19†                                | 16†                                |
| Anion gap (mmol/liter)               | 10 - 20         | -                                 | -                                 | -                                  | -                                  | -                                  | 16                                 | -                                  |
| Glucose (mmol/liter)                 | 65 - 99         | 103*                              | 89                                | 100*                               | 108*                               | 98                                 | 111*                               | -                                  |
| Blood urea nitrogen (mmol/liter)     | 8 - 22          | 64*                               | 17                                | 6                                  | 9                                  | 17                                 | 24*                                | -                                  |
| Creatinine (mg/dl)                   | 0.50 - 1.30     | 1.28                              | 0.59                              | 0.45†                              | 0.49                               | 0.83                               | 0.94                               | 2.69*                              |
| Total protein (g/dl)                 | 6 - 8           | -                                 | -                                 | -                                  | -                                  | -                                  | 4.9†                               | 4.9†                               |
| Albumin (g/dl)                       | 3.5 - 5.0       | -                                 | -                                 | -                                  | -                                  | -                                  | 1.4†                               | -                                  |
| Total bilirubin (mg/dl)              | <1              | -                                 | -                                 | -                                  | -                                  | -                                  | 0.2                                | -                                  |
| Procalcitonin (ng/ml)                | <0.25           | -                                 | -                                 | 0.33*                              | -                                  | -                                  | -                                  | 14.7‡                              |
| Alanine aminotransferase (U/liter)   | 10 - 50         | -                                 | -                                 | -                                  | -                                  | -                                  | 11                                 | -                                  |
| Aspartate aminotransferase (U/liter) | 10 - 50         | -                                 | -                                 | -                                  | -                                  | -                                  | 84*                                | -                                  |
| Alkaline phosphatase (U/liter)       | 40 - 129        | -                                 | -                                 | -                                  | -                                  | -                                  | 376*                               | -                                  |
| Prothrombin time (sec)               | 11.8 - 14.4     | -                                 | -                                 | -                                  | -                                  | -                                  | 15.7*                              | 25*                                |
| International normalized ratio       | 0.88 - 1.14     | -                                 | -                                 | -                                  | -                                  | -                                  | 1.27*                              | 2.32*                              |
| Venous lactate (mmol/liter)          | 0.5-1.6         | -                                 | -                                 | -                                  | -                                  | 1.6                                | -                                  | -                                  |
| Calcium (mg/dl)                      | 8.5 - 10.3      | 8.7                               | 8.8                               | -                                  | 7.6                                | 6.7†                               | 6.9†                               | 6.9†                               |
| Magnesium (mg/dl)                    | 1.6 - 2.6       | 2.9*                              | 1.8                               | -                                  | 1.8                                | 3.2*                               | 2                                  | 2.8                                |
| Osmolality (mOsm/kg)                 | 275 - 295       | 280                               | -                                 | -                                  | -                                  | -                                  | -                                  | -                                  |
| Phosphorus (mg/dl)                   | 2.5 - 4.5       | -                                 | -                                 | -                                  | -                                  | -                                  | 3.6                                | -                                  |
| Uric Acid (mg/dl)                    | 4 - 8.1         | 11.1*                             | -                                 | -                                  | -                                  | -                                  | -                                  | -                                  |
| CRP (mg/l)                           | <1              | -                                 | 184.2*                            | -                                  | -                                  | -                                  | -                                  | -                                  |
| Ferritin (ng/ml)                     | 30 - 330        | -                                 | -                                 | -                                  | -                                  | -                                  | 3334*                              | -                                  |
| GGT (U/l)                            | 8 - 61          | -                                 | -                                 | -                                  | -                                  | -                                  | 126*                               | -                                  |
| Haptoglobin (mg/dl)                  | 30 - 200        | -                                 | -                                 | -                                  | -                                  | -                                  | 306*                               | -                                  |
| CD4+ (cells/mm <sup>3</sup> )        | 512 – 1,499     | <35†                              | -                                 | -                                  | -                                  | -                                  | -                                  | -                                  |
| HIV Viral Load (copies/mL)           | <20             | 26,500*                           | -                                 | -                                  | -                                  | -                                  | -                                  | -                                  |

\*Above reference range

† Below reference range

‡ Data from illness Day 49, Hospital Day 25

| <b>Table 3. Diagnostic Test Results</b> |                            |                       |                           |                                      |  |
|-----------------------------------------|----------------------------|-----------------------|---------------------------|--------------------------------------|--|
| <b>Pathogen/Target</b>                  | <b>Test</b>                | <b>Type of Sample</b> | <b>Date of Collection</b> | <b>Result</b>                        |  |
| Covid                                   | PCR*                       | Nasopharyngeal Swab   | Hospital day 1            | Negative                             |  |
| Gonorrhea                               | PCR*                       | Rectal Swab           | Hospital day 1            | Negative                             |  |
| Chlamydia                               | PCR*                       | Rectal Swab           | Hospital day 1            | Negative                             |  |
| Cryptococcus                            | Antigen Enzyme Immunoassay | Blood                 | Hospital Day 2            | Negative                             |  |
| Syphilis                                | Antibody                   | Blood                 | Hospital Day 2            | Positive                             |  |
| Syphilis                                | RPR Titter                 | Blood                 | Hospital Day 2            | Negative                             |  |
| Bacteria                                | Culture                    | Blood                 | Hospital Day 2            | No growth at 5 days                  |  |
| Bacteria                                | Culture                    | Blood                 | Hospital Day 2            | No growth at 5 days                  |  |
| Clostridium difficile                   | PCR*                       | Stool                 | Hospital Day 7            | Negative                             |  |
| Giardia                                 | Antigen Enzyme Immunoassay | Stool                 | Hospital Day 9            | Negative                             |  |
| Cryptosporidium                         | Antigen Enzyme Immunoassay | Stool                 | Hospital Day 9            | Negative                             |  |
| Cytomegalovirus IgG                     | Antibody                   | Blood                 | Hospital Day 9            | Positive                             |  |
| Cytomegalovirus IgM                     | Antibody                   | Blood                 | Hospital Day 9            | Negative                             |  |
| Acid Fast Bacilli                       | Acid Fast Smear            | Stool                 | Hospital Day 10           | None observed at 0, 1, 7 and 14 days |  |
| Acid Fast Bacilli                       | Culture                    | Stool                 | Hospital Day 10           | None isolated at 1, 7 and 14 days    |  |
| Cryptococcus                            | Antigen Enzyme Immunoassay | Blood                 | Hospital Day 11           | Negative                             |  |
| Salmonella                              | Culture                    | Stool                 | Hospital Day 11           | Negative                             |  |
| Shigella                                | Culture                    | Stool                 | Hospital Day 11           | Negative                             |  |
| Yersinia                                | Culture                    | Stool                 | Hospital Day 11           | Negative                             |  |
| Campylobacter                           | Culture                    | Stool                 | Hospital Day 11           | Negative                             |  |
| E. Coli O157:H7                         | Culture                    | Stool                 | Hospital Day 11           | Negative                             |  |
| Herpes Simplex Virus 1 and 2            | PCR*                       | Rectal Swab           | Hospital Day 13           | Negative                             |  |
| Ova and Parasites                       | Microscopy                 | Stool                 | Hospital day 15           | Negative                             |  |
| Bacteria                                | Culture                    | Blood                 | Hospital Day 18           | Staphylococcus epidermidis           |  |
| Bacteria                                | Culture                    | Blood                 | Hospital Day 18           | Staphylococcus epidermidis           |  |
| Bacteria                                | Culture                    | Pleural Fluid         | Hospital Day 18           | No growth at 5 days                  |  |
| Bacteria                                | Gram Stain                 | Pleural Fluid         | Hospital Day 18           | Rare PMNs observed                   |  |
| Adeno Deaminase                         | Chemistry                  | Pleural Fluid         | Hospital Day 18           | 9.5 U/L                              |  |
| Protein                                 | Chemistry                  | Pleural Fluid         | Hospital Day 18           | 5.4 g/dL                             |  |

|                               |                             |                |                 |                                                      |
|-------------------------------|-----------------------------|----------------|-----------------|------------------------------------------------------|
| Triglycerides                 | Chemistry                   | Pleural Fluid  | Hospital Day 18 | 59 mg/dl                                             |
| pH                            | Chemistry                   | Pleural Fluid  | Hospital Day 18 | 7.97 pH                                              |
| LDH                           | Chemistry                   | Pleural Fluid  | Hospital Day 18 | 584 U/L                                              |
| Cholesterol                   | Chemistry                   | Pleural Fluid  | Hospital Day 18 | 33 mg/dL                                             |
| Nucleated Cell Count          | Chemistry                   | Pleural Fluid  | Hospital Day 18 | 752 /cumm                                            |
| Segmented Neutrophils         | Chemistry                   | Pleural Fluid  | Hospital Day 18 | 75%                                                  |
| Lymph                         | Chemistry                   | Pleural Fluid  | Hospital Day 18 | 22%                                                  |
| Monocytes/Histiocytes         | Chemistry                   | Pleural Fluid  | Hospital Day 18 | 3%                                                   |
| MRSA                          | Culture                     | Sputum induced | Hospital day 19 | None isolated                                        |
| Pseudomonas aeruginosa        | Culture                     | Sputum induced | Hospital day 19 | None isolated                                        |
| Bacteria                      | Gram Stain                  | Sputum induced | Hospital day 19 | No PMINs t observed, 2+ GN Cocccobacilli, 1+ GN Rods |
| Coccidiomycosis               | Antibody                    | Blood          | Hospital day 19 | Negative                                             |
| Acid Fast Bacilli             | Acid Fast Smear             | Pleural Fluid  | Hospital day 19 | None observed                                        |
| Acid Fast Bacilli             | Culture                     | Pleural Fluid  | Hospital day 19 | None isolated at 1 week                              |
| Bacteria                      | Culture                     | Blood          | Hospital day 19 | No growth at 5 days                                  |
| Acid Fast Bacilli             | Acid Fast Smear             | Sputum Induced | Hospital Day 20 | None observed                                        |
| Acid Fast Bacilli             | Culture                     | Sputum Induced | Hospital Day 20 | None isolated at 1 week                              |
| Bacteria                      | Culture                     | Blood          | Hospital Day 20 | No growth at 5 days                                  |
| Bacteria                      | Culture                     | Pleural Fluid  | Hospital Day 20 | No growth at 5 days                                  |
| Bacteria                      | Gram Stain                  | Pleural Fluid  | Hospital Day 20 | Rare PMINs† observed                                 |
| Acid Fast Bacilli             | Acid Fast Smear             | Sputum Induced | Hospital Day 21 | None observed                                        |
| Acid Fast Bacilli             | Culture                     | Sputum Induced | Hospital Day 21 | None isolated at 1 week                              |
| Bacteria                      | Culture                     | Blood          | Hospital Day 23 | No growth at 5 days                                  |
| Fungitell (1-3)-beta-D-Glucan | Fungitell                   | Blood          | Hospital Day 23 | Negative                                             |
| Clostridium diffcil           | PCR*                        | Stool          | Hospital Day 24 | Negative                                             |
| Histoplasmosis                | Antigen Enzyme Immunoassay  | Urine          | Hospital day 24 | Negative                                             |
| Pneumocystis Pneumonia (PCP)  | Direct Fluorescent Antibody | Sputum Induced | Hospital day 25 | Negative                                             |
| Fungal                        | Culture                     | Blood          | Hospital Day 25 | No growth at 6 days                                  |
| MRSA                          | Culture                     | Sputum induced | Hospital day 25 | None isolated                                        |
| Pseudomonas aeruginosa        | Culture                     | Sputum induced | Hospital day 25 | None isolated                                        |
| Bacteria                      | Gram Stain                  | Sputum induced | Hospital day 25 | 3+ PMINs† observed                                   |

|               |         |                        |                 |                     |
|---------------|---------|------------------------|-----------------|---------------------|
| Bacteria      | Culture | Blood                  | Hospital Day 27 | No growth at 3 days |
| Bacteria      | Culture | Urine                  | Hospital Day 26 | Negative            |
| Orthopoxvirus | PCR*    | Brain                  | Autopsy         | Positive            |
| Orthopoxvirus | PCR*    | Bone Marrow            | Autopsy         | Positive            |
| Orthopoxvirus | PCR*    | Lung Lymph Node        | Autopsy         | Positive            |
| Orthopoxvirus | PCR*    | Inguinal Lymph Node    | Autopsy         | Positive            |
| Orthopoxvirus | PCR*    | Lung                   | Autopsy         | Positive            |
| Orthopoxvirus | PCR*    | Heart                  | Autopsy         | Positive            |
| Orthopoxvirus | PCR*    | Liver                  | Autopsy         | Positive            |
| Orthopoxvirus | PCR*    | Spleen                 | Autopsy         | Positive            |
| Orthopoxvirus | PCR*    | Adrenal Glands         | Autopsy         | Positive            |
| Orthopoxvirus | PCR*    | Kidney                 | Autopsy         | Positive            |
| Orthopoxvirus | PCR*    | Gastrointestinal tract | Autopsy         | Positive            |
| Orthopoxvirus | PCR*    | Testicle               | Autopsy         | Positive            |
| Orthopoxvirus | PCR*    | Skin Lesion 1          | Autopsy         | Positive            |
| Orthopoxvirus | PCR*    | Skin Lesion 2          | Autopsy         | Positive            |
| Orthopoxvirus | PCR*    | Facial Skin Lesion     | Autopsy         | Positive            |
| Orthopoxvirus | PCR*    | Pleural Fluid          | Autopsy         | Positive            |

\* Polymerase Chain Reaction

† Polymerase Chain Reaction

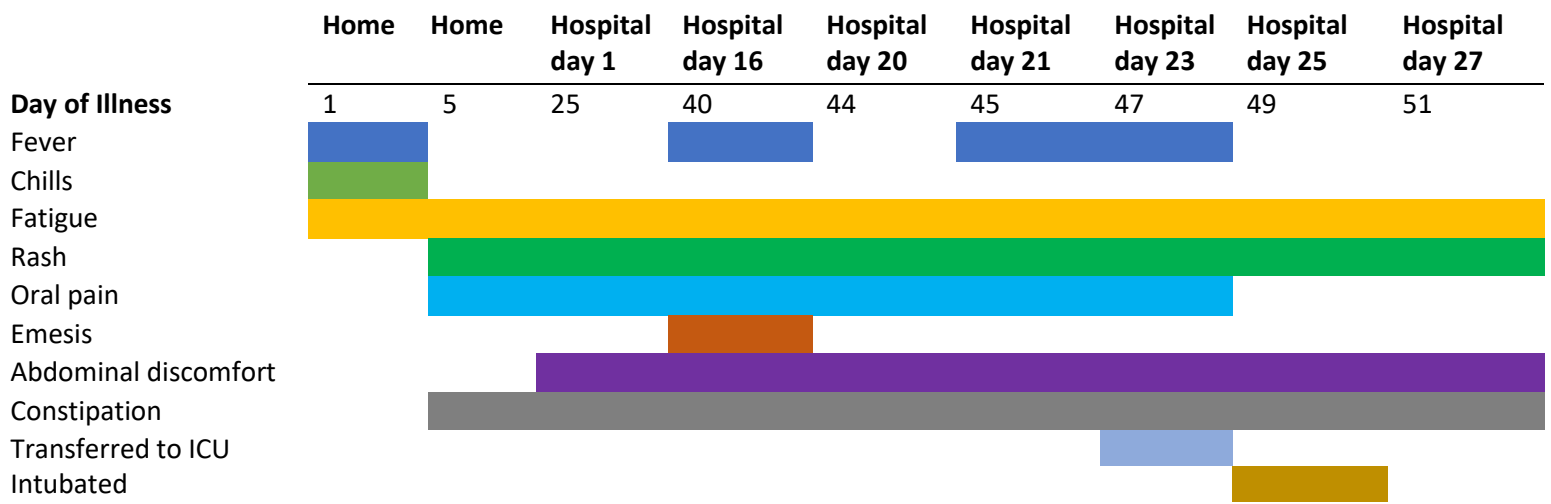

**Supplemental Figure 1.** Major event and symptoms time-line

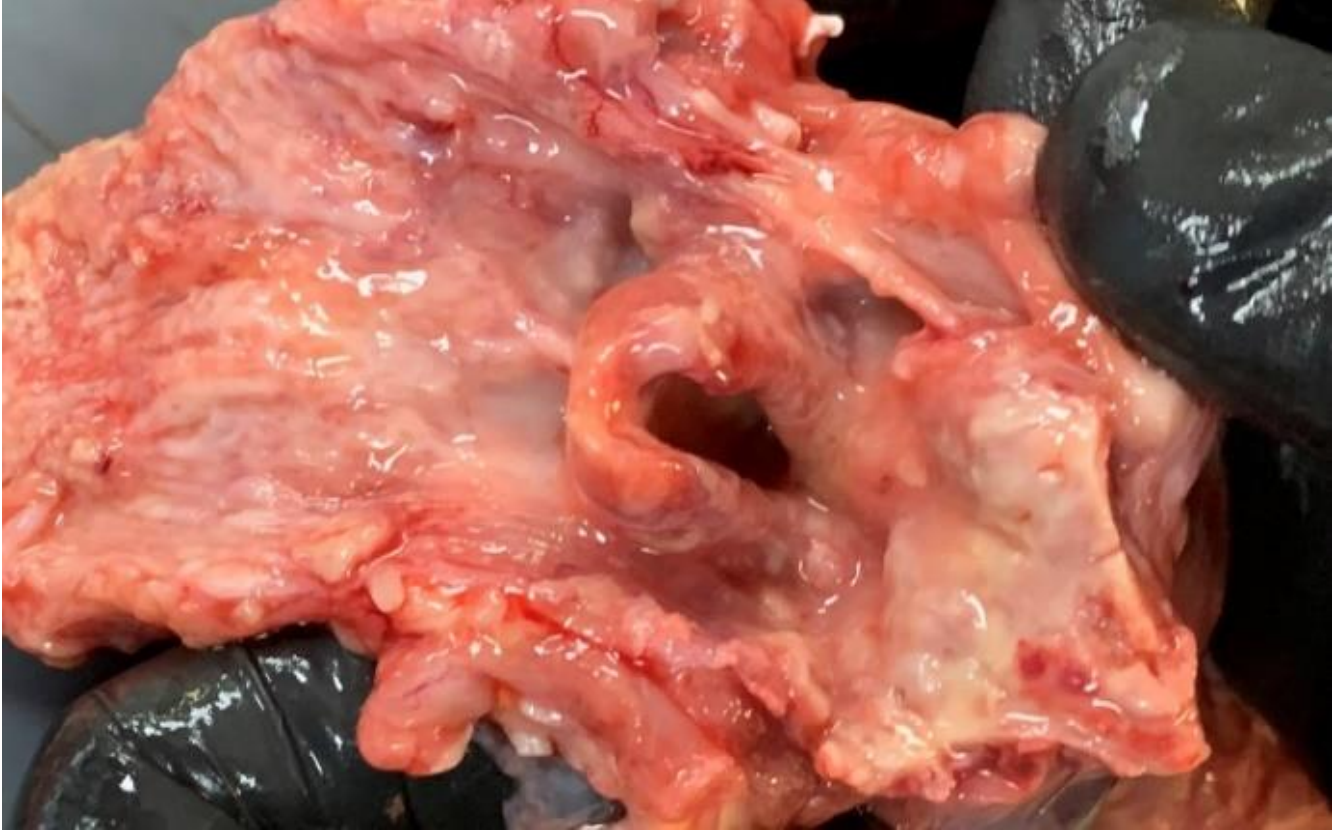

**Supplemental Figure 2A.** Mpx lesions across the epiglottis.

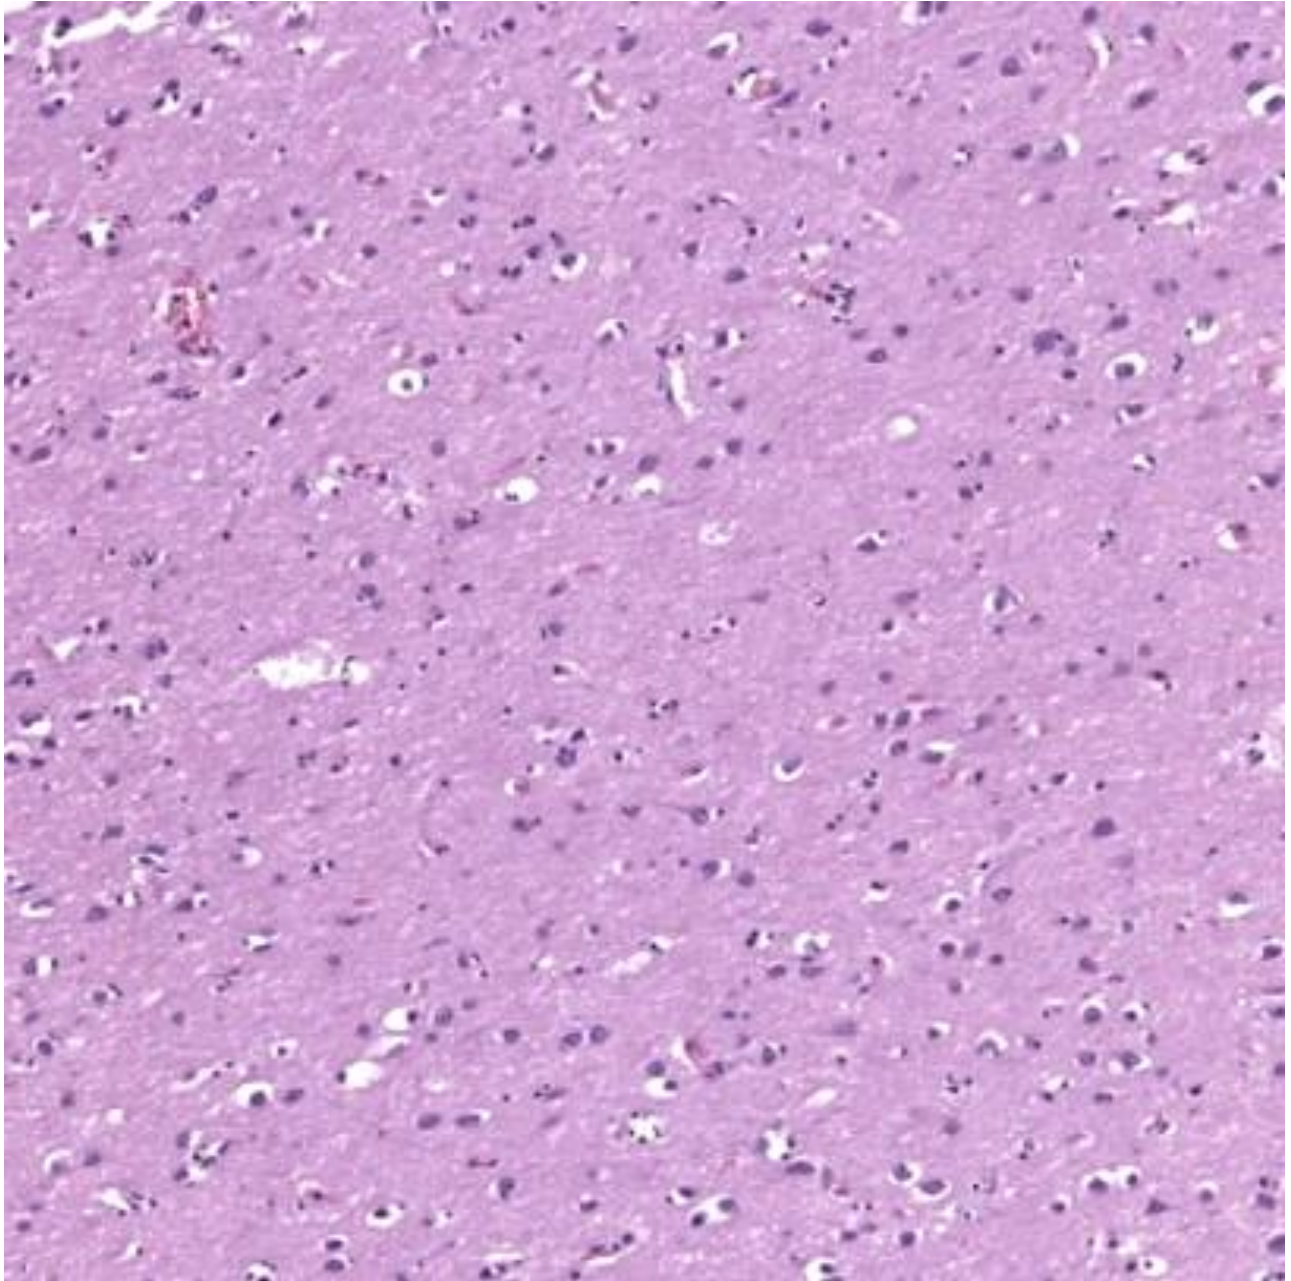

**Supplemental Figure 2B.** The brain (H&E 20X) is seen with no significant inflammation, the layers of the cerebral cortex are well-formed, triangular neurons and glial cells are not increased in number and are scattered in a background of pink neuropil.

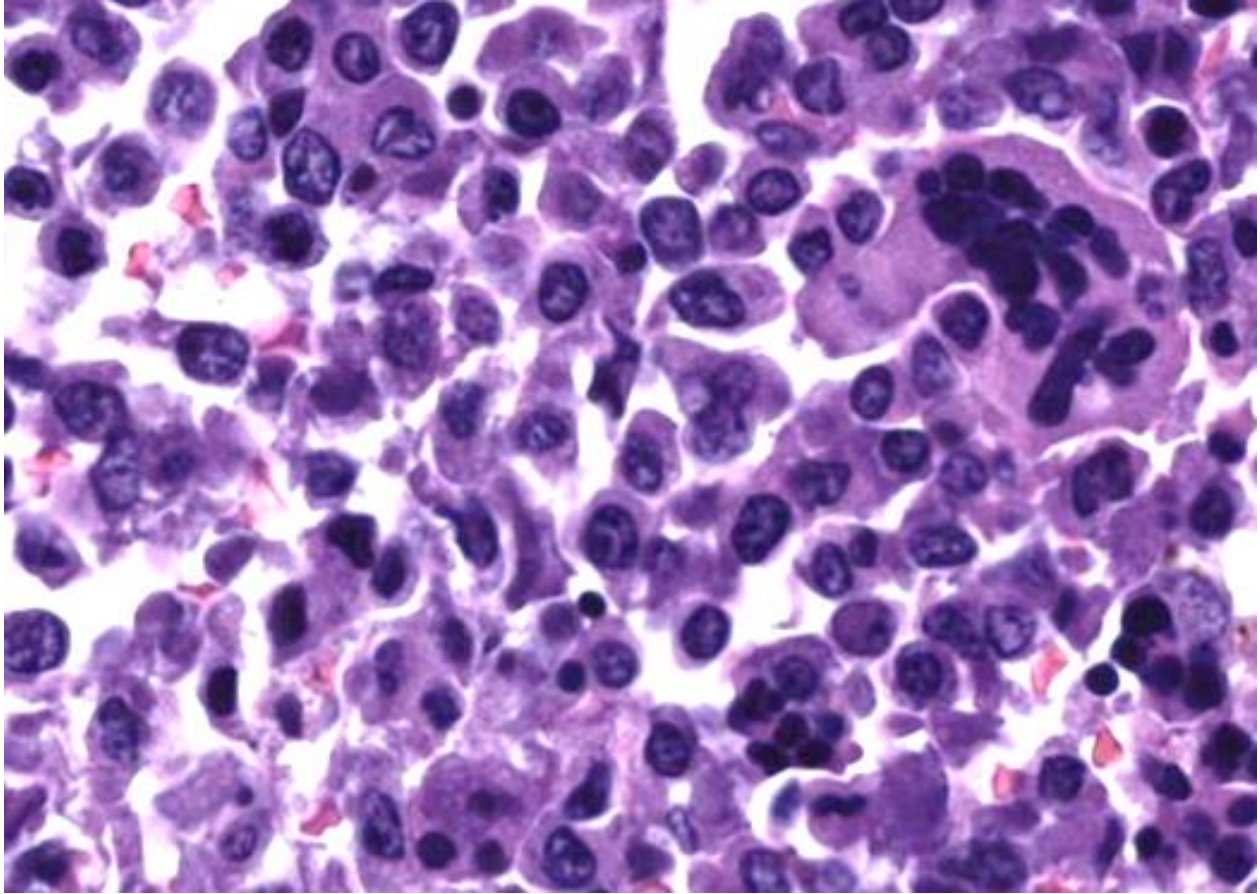

**Supplemental Figure 2C.** Markedly hypercellular bone marrow (99% cellular) (H&E 20X) with expanded trilineage hematopoiesis, including myeloid cell hyperplasia and hyperlobated megakaryocytes, occurring in a background of necrotic debris and high cell turnover. Occasional bone marrow macrophages demonstrate evidence of hemophagocytic lymphohistiocytosis (HLH).



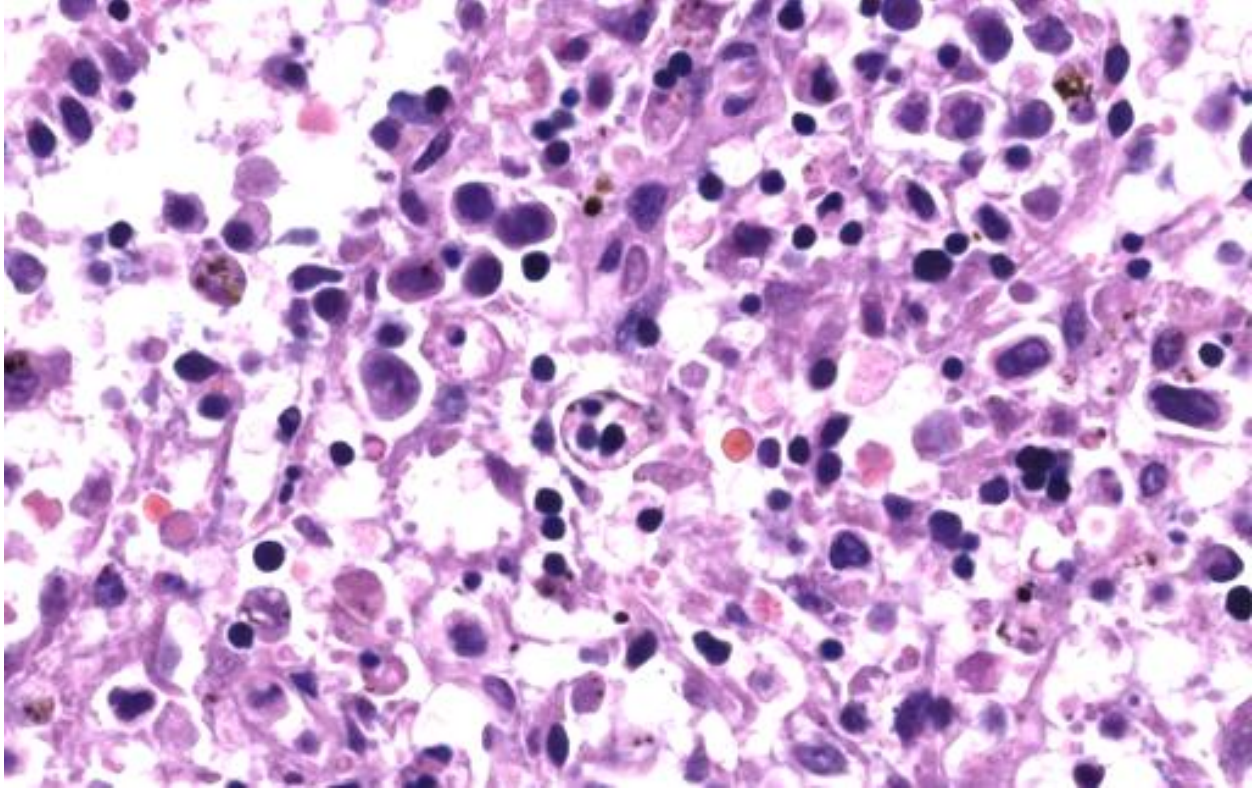

**Supplemental Figure 2D.** The spleen (H&E 20X) is notable for white pulp expansion by reactive lymphocytes, plasma cells, and histiocytes featuring prominent hemophagocytic lymphohistiocytosis (HLH).

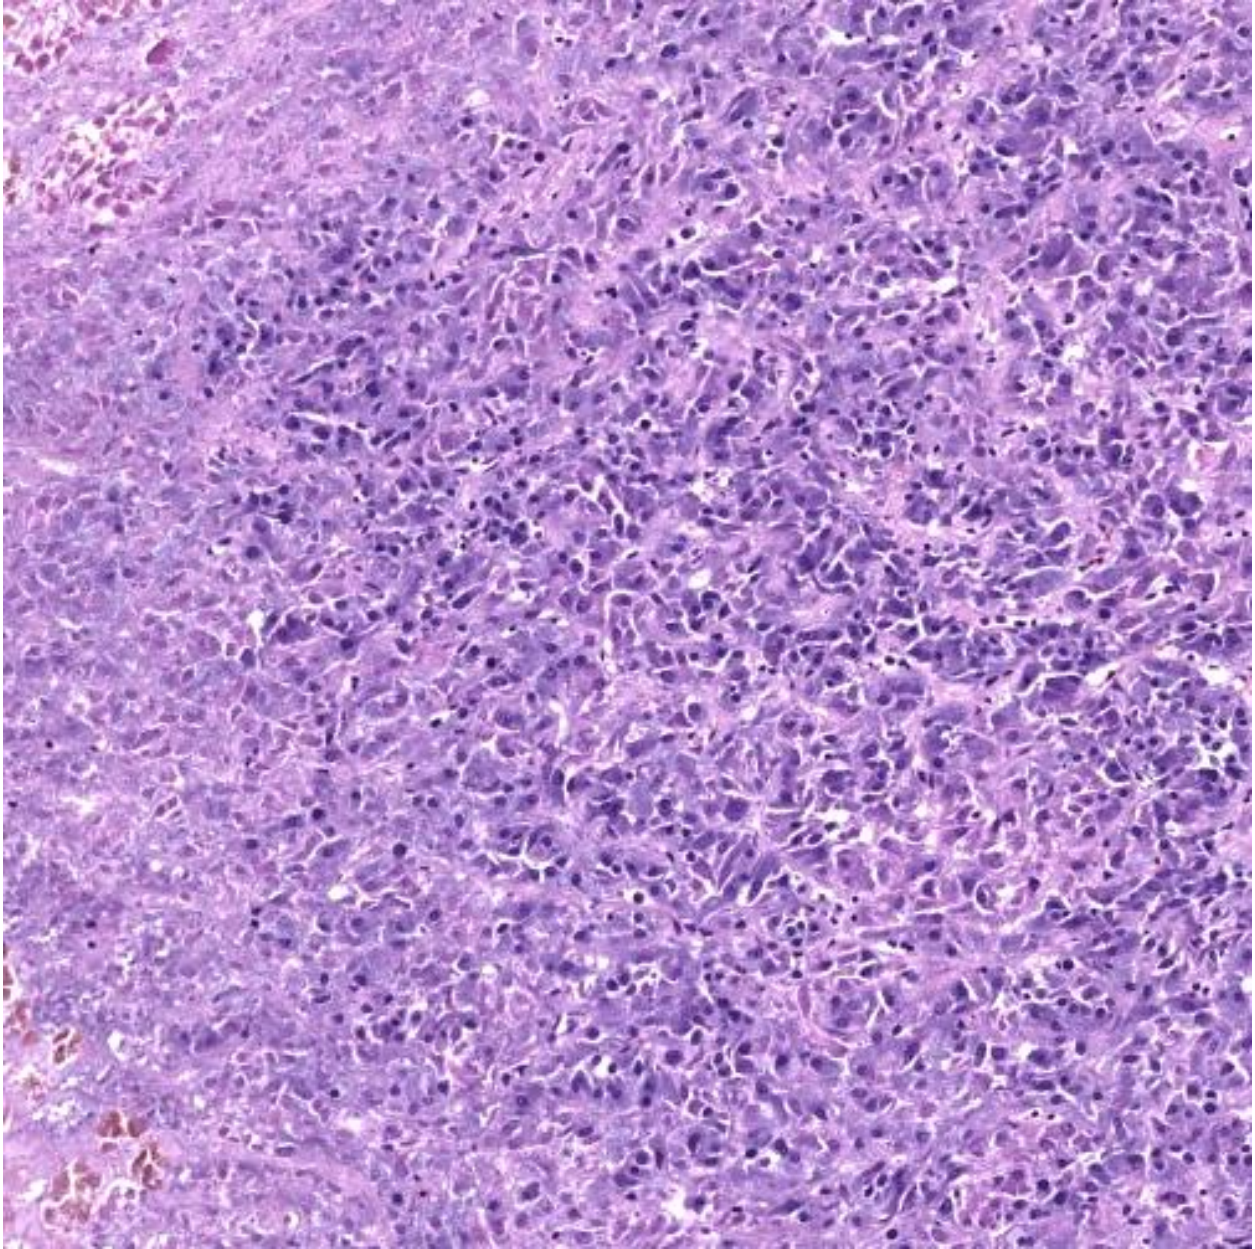

**Supplemental Figure 2E.** The adrenal gland (H&E 10X) demonstrates diffuse autolyzed parenchyma commonly seen in the post-mortem setting; some of the soft tissue around the right adrenal gland demonstrates mild chronic inflammation. There is no histomorphologic evidence of viral changes.

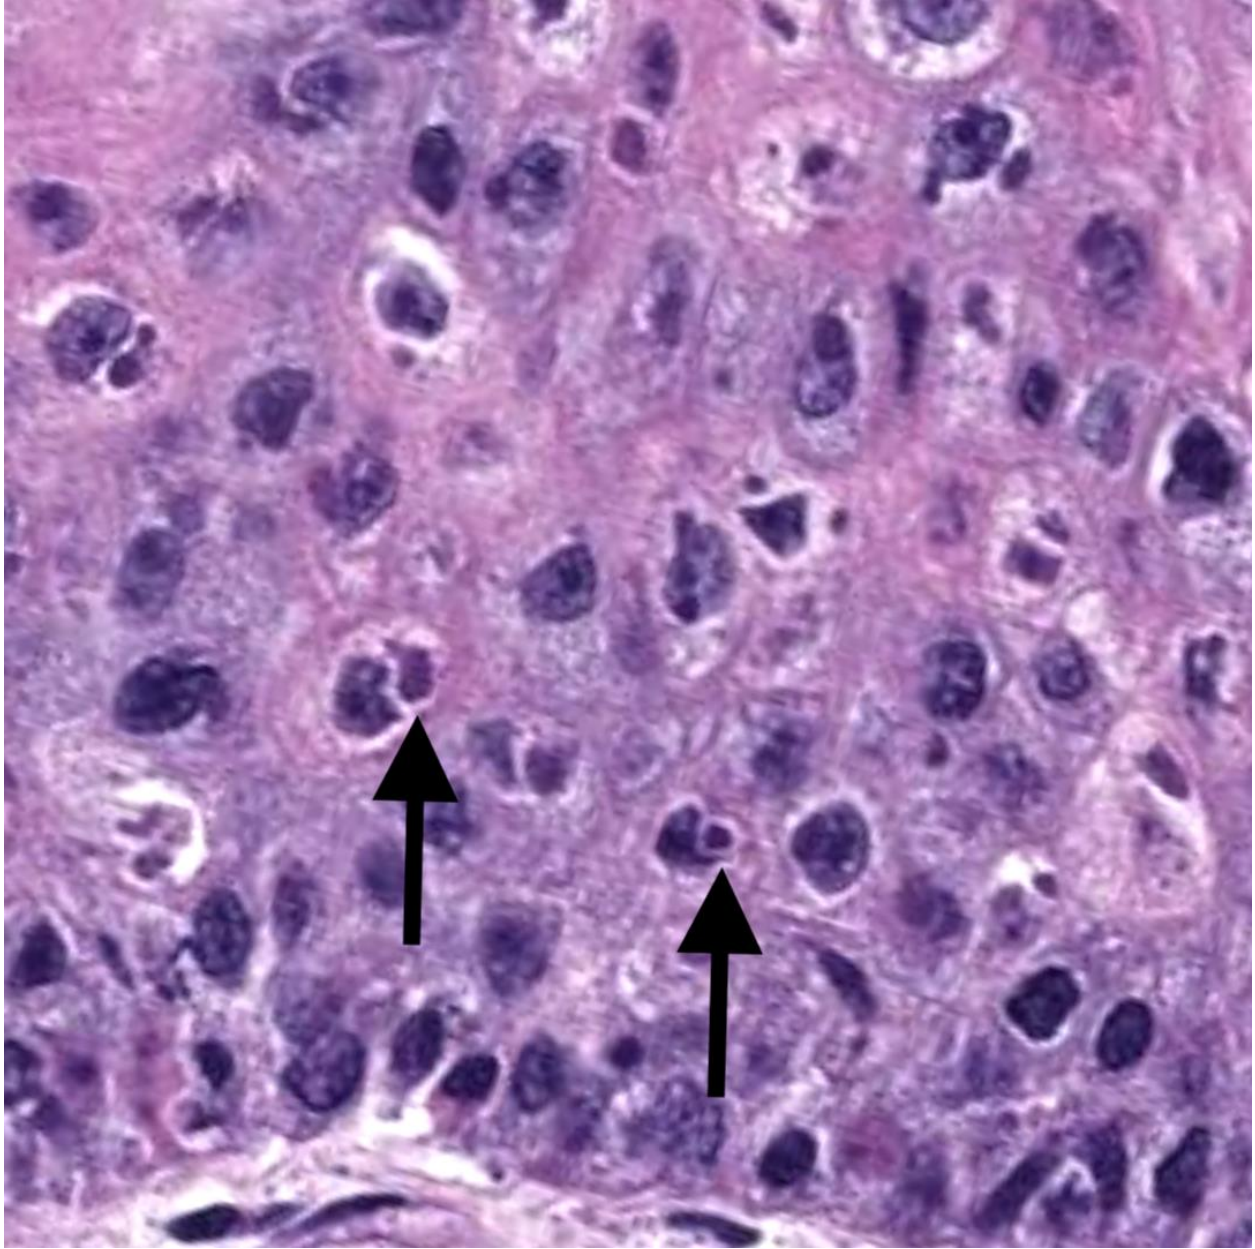

**Supplemental Figure 2F.** Epiglottis (H&E 40x): High power view of the epiglottis mucosa demonstrates scattered epithelial cells exhibiting eosinophilic intracellular inclusions, consistent with Guarnieri bodies (arrows).

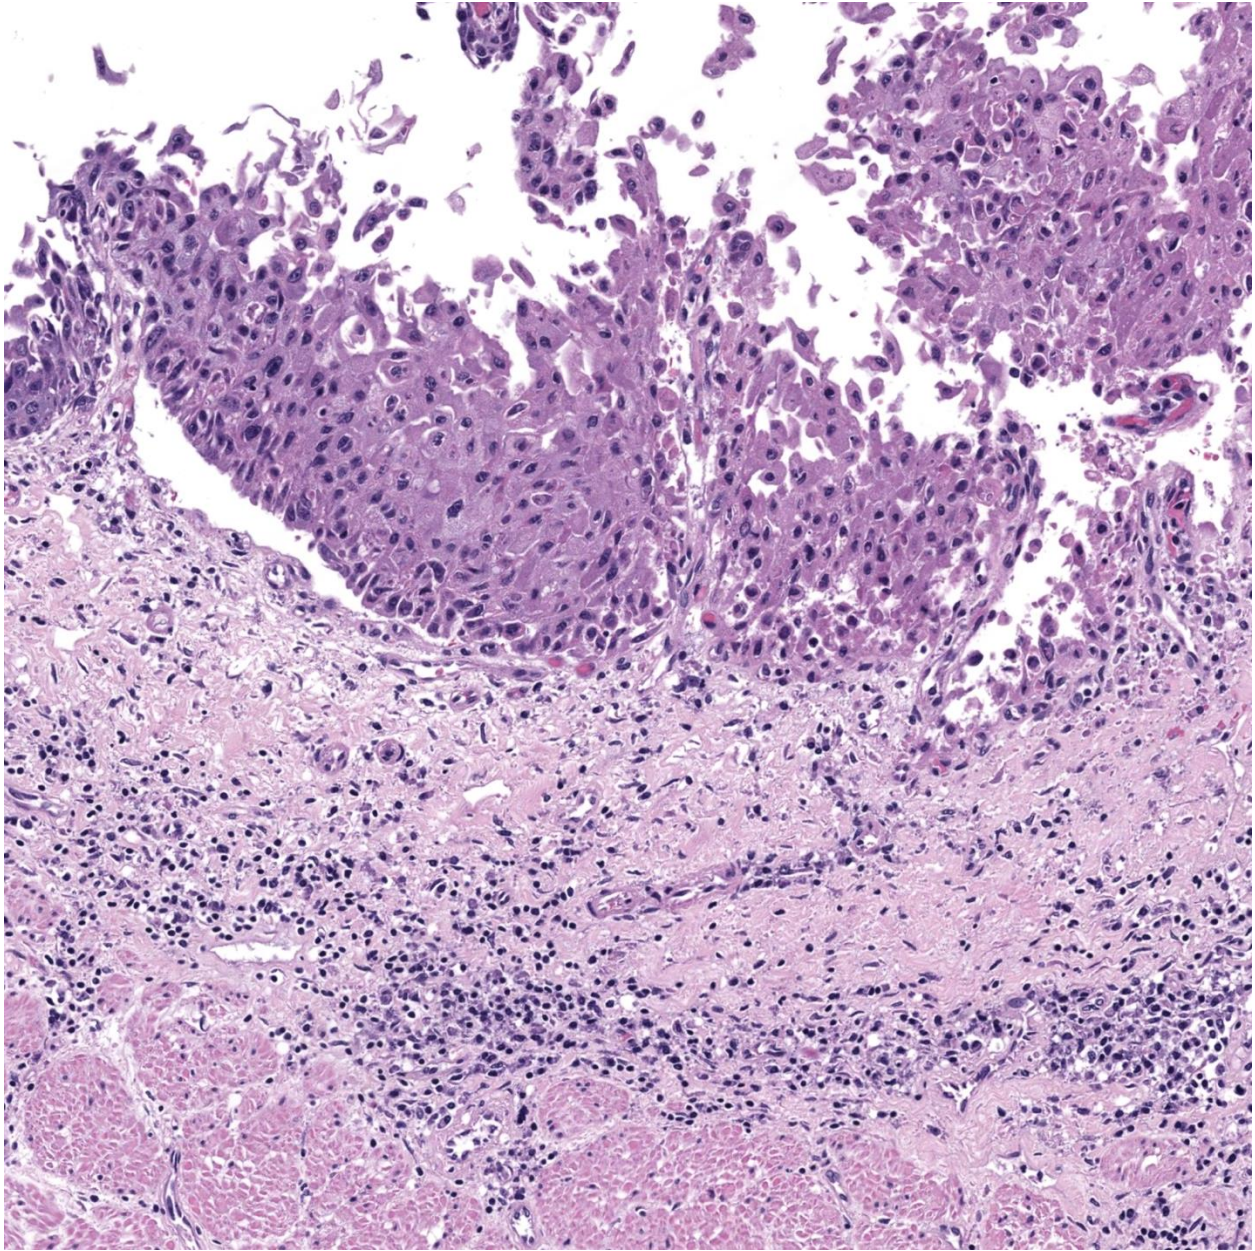

**Supplemental Figure 2G.** Esophagus (H&E 20x): The esophagus demonstrates large areas of mucosal ulceration and necrosis, with scattered large multinucleated cells with cleared cytoplasm. Some epithelial cells exhibit eosinophilic intracellular inclusions, consistent with Guarnieri bodies.

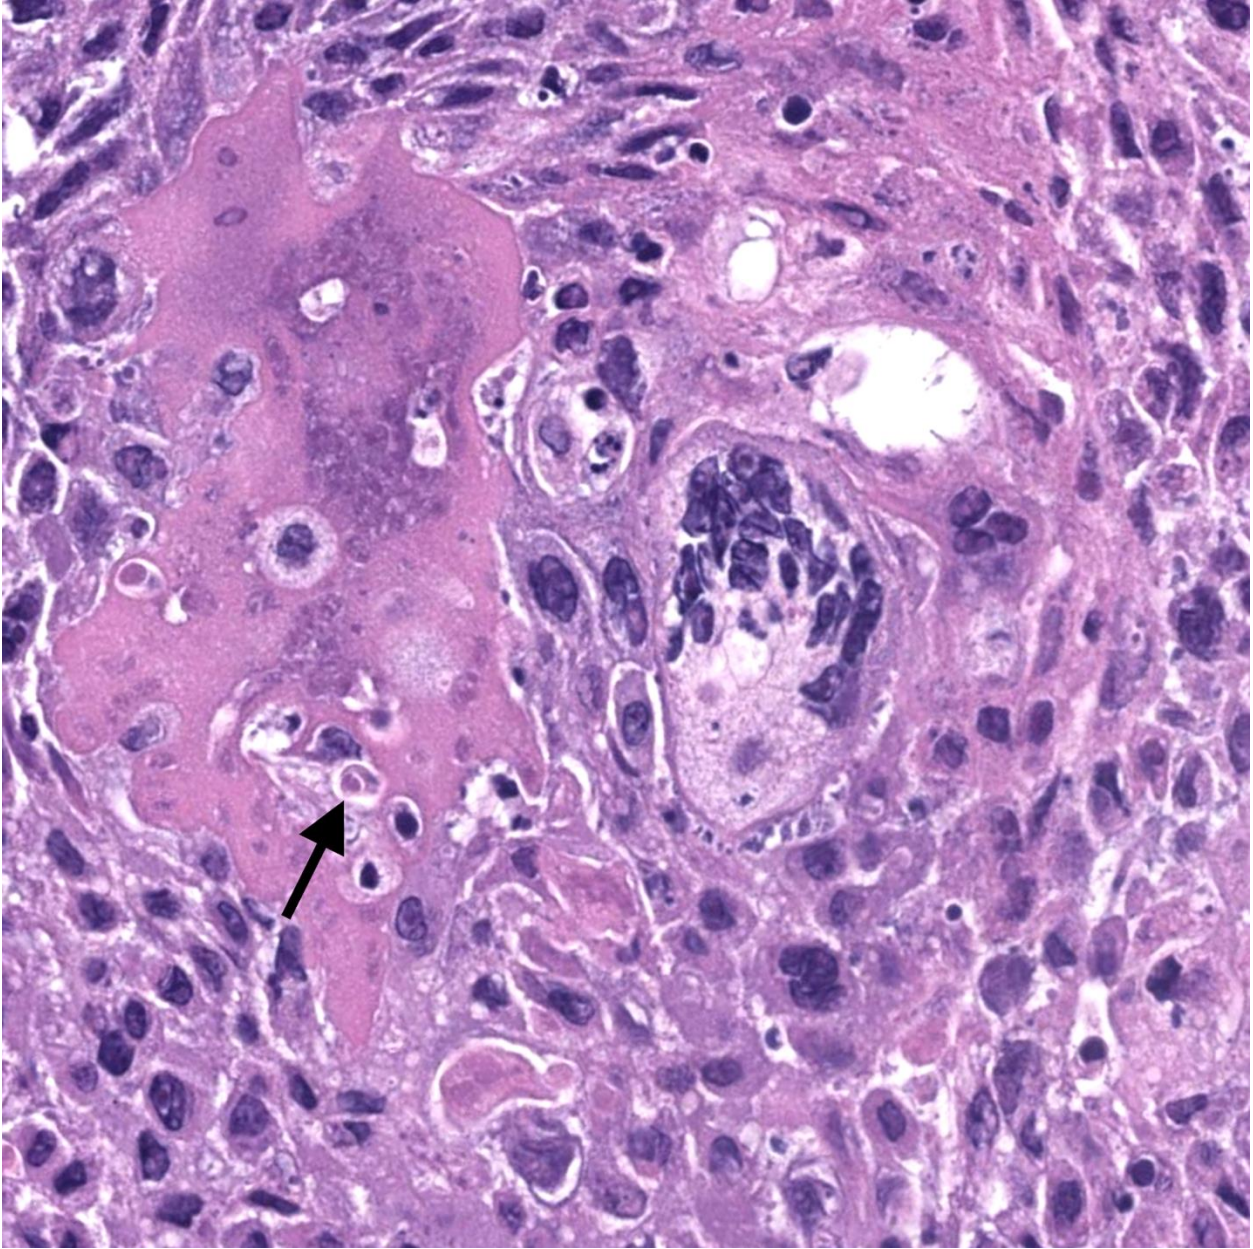

**Supplemental Figure 2H.** Tongue (H&E 20X): The ulcerated lesion of the tongue shows multinucleated cells with nuclear enlargement, nuclear grooves, hyperchromasia as well as some red nucleoli; there are some cells which demonstrate chromatin margination and intracellular eosinophilic inclusions consistent with Guarnieri bodies (arrow).

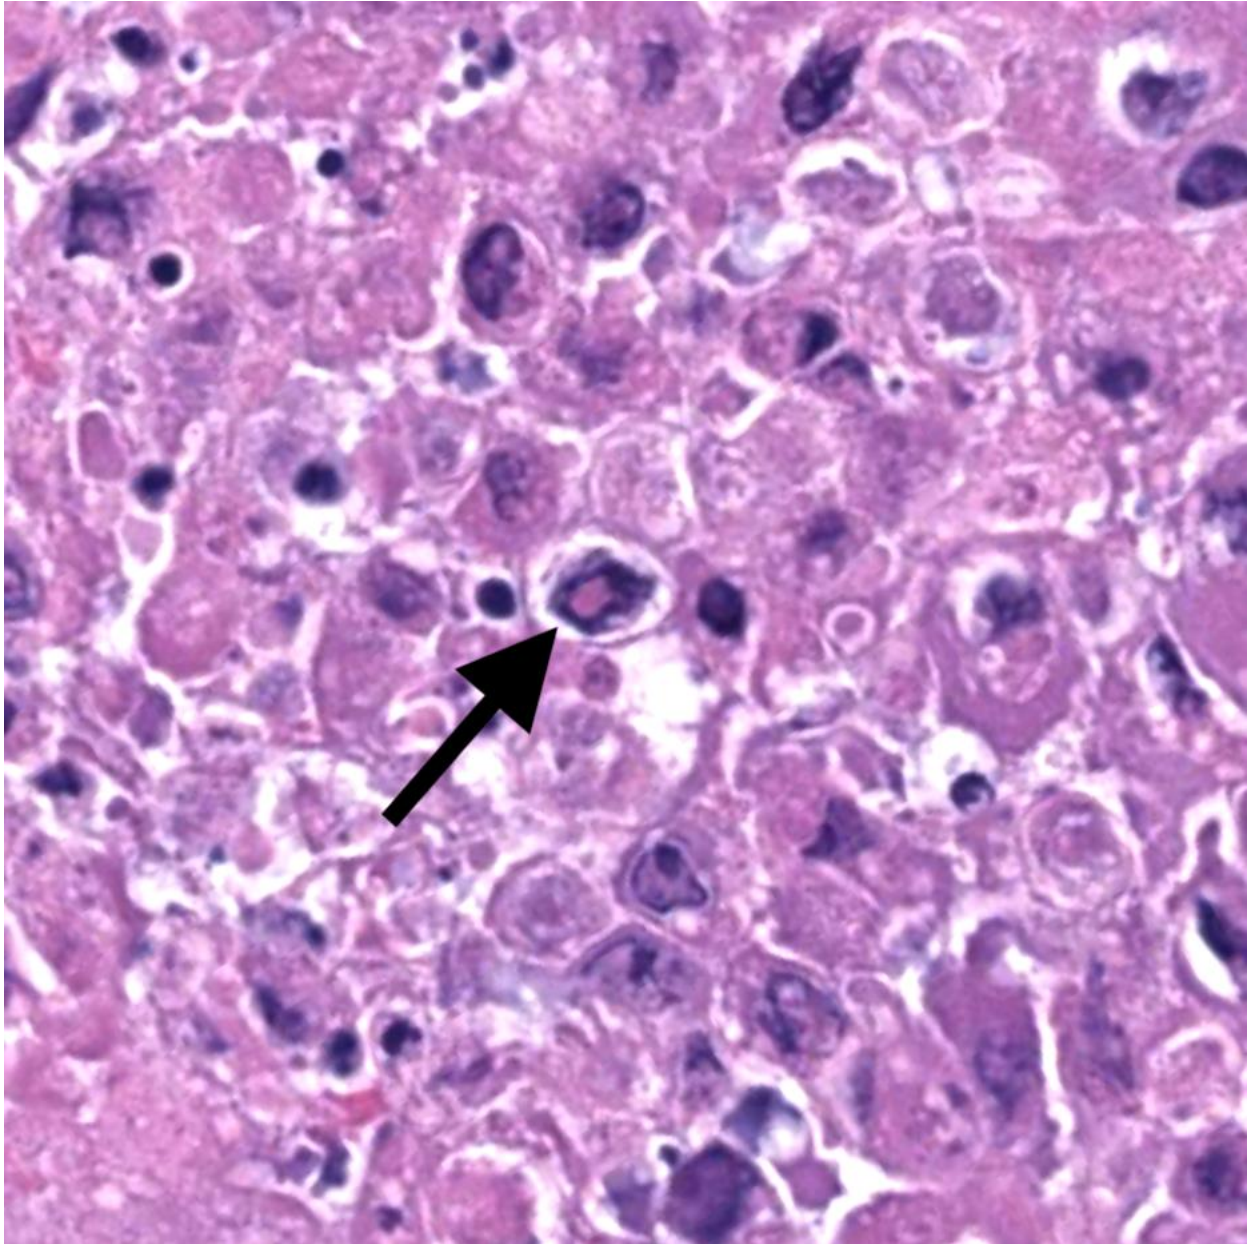

**Supplemental Figure 2I.** Tongue (H&E 40X): High magnification field of tongue showing epithelial cell with an eosinophilic inclusion consistent with Guarnieri body (arrow).

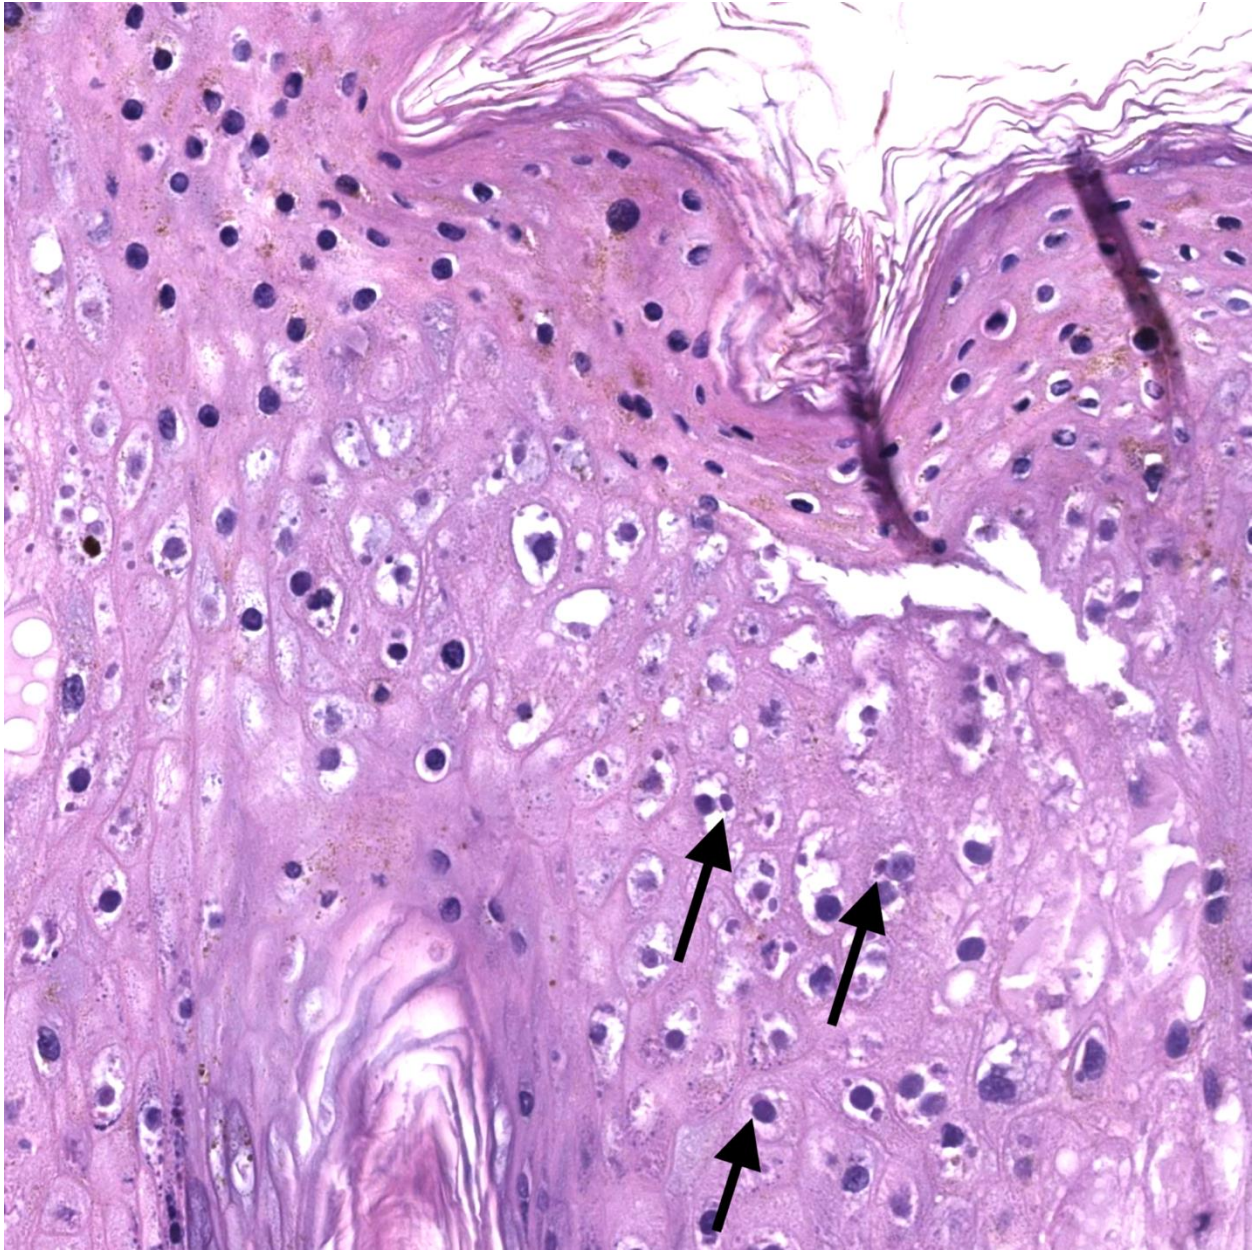

**Supplemental Figure 2J.** Skin bulla (H&E 20X): Higher magnification of the pustular stage skin bulla shows ballooning degeneration of keratinocytes with scattered eosinophilic inclusions, consistent with Guarnieri bodies (arrows).

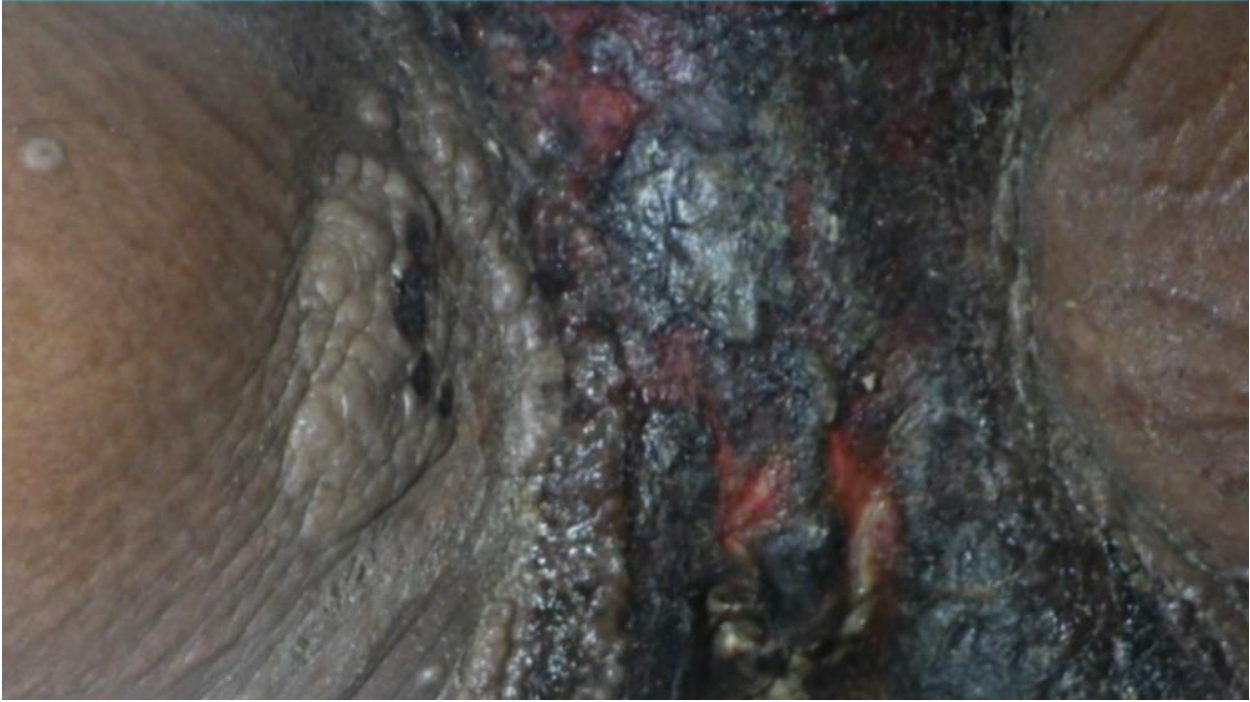

**Supplemental Figure 2K.** Perianal lesions, necrotic tissue, ulcerations noted.



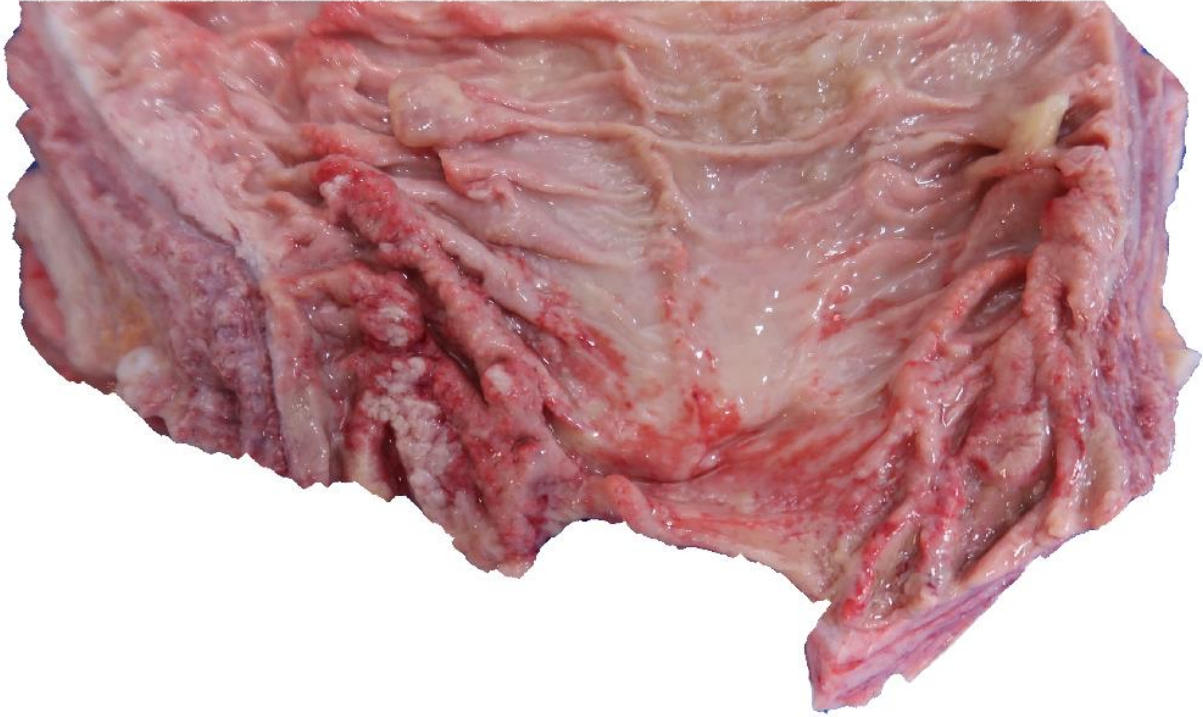

**Supplemental Figure 2L.** Rectum with polyp (clear arrow) and multiple ulcers (filled arrows).

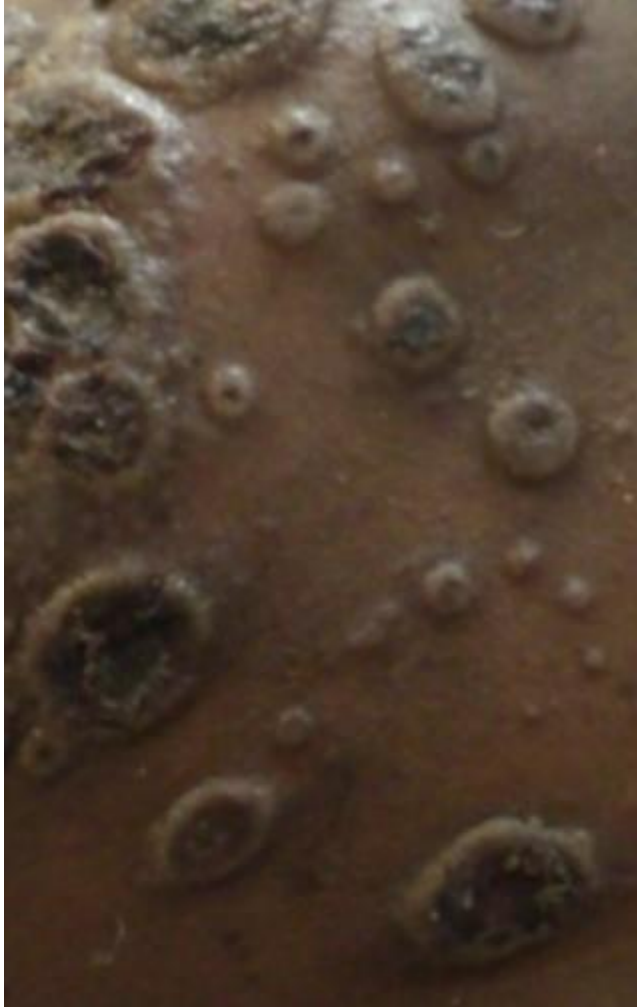

**Supplemental Figure 2M.** Pustular skin lesions with central necrotic ulceration.
